# Supplementary material for: Fast and Sensitive Analysis of Short- and Long-Chain Perfluoroalkyl Substances in Foods of Animal Origin
Source: MDPI journal article supplement (doi:10.3390/molecules27227899), 2022-11-15
Supplement: s1 [file s1]

Supplementary materials

**Table S1.** Detailed information about the 63 analysed food samples

| Matrix<br>(n) | Species/Category | Sample<br>ID |
|---------------|------------------|--------------|
| Liver (34)    | Trout            | L1           |
|               | Trout            | L2           |
|               | Hen              | L3           |
|               | Calf             | L4           |
|               | Calf             | L5           |
|               | Calf             | L6           |
|               | Calf             | L7           |
|               | Calf             | L8           |
|               | Calf             | L9           |
|               | Calf             | L10          |
|               | Calf             | L11          |
|               | Calf             | L12          |
|               | Calf             | L13          |
|               | Calf             | L14          |
|               | Bullock          | L15          |
|               | Bullock          | L16          |
|               | Bullock          | L17          |
|               | Bullock          | L18          |
|               | Bullock          | L19          |
|               | Bullock          | L20          |
|               | Bullock          | L21          |
|               | Bullock          | L22          |
|               | Bullock          | L23          |
|               | Bullock          | L24          |
|               | Bovine Adult     | L25          |
|               | Bovine Adult     | L26          |
|               | Bovine Adult     | L27          |
|               | Bovine Adult     | L28          |
|               | Bovine Adult     | L29          |
|               | Bovine Adult     | L30          |
|               | Bovine Adult     | L31          |
|               | Bovine Adult     | L32          |
|               | Swine            | L33          |
|               | Swine            | L34          |
| Eggs (6)      | Hens             | E1           |
|               | Hens             | E2           |
|               | Hens             | E3           |
|               | Hens             | E4           |
|               | Hens             | E5           |
|               | Hens             | E6           |
| Muscle (17)   | Trout            | M1           |
|               | Sea Bream        | M2           |
|               | Salmon           | M3           |
|               | Trout            | M4           |

|          |                  |     |
|----------|------------------|-----|
|          | Trout            | M5  |
|          | <i>Pangasius</i> | M6  |
|          | Chicken          | M7  |
|          | Chicken          | M8  |
|          | Chicken          | M9  |
|          | Chicken          | M10 |
|          | Chicken          | M11 |
|          | Chicken          | M12 |
|          | Bovine           | M13 |
|          | Bovine           | M14 |
|          | Bovine           | M15 |
|          | Bovine           | M16 |
|          | Swine            | M17 |
| Milk (6) | Cow              | Mi1 |
|          | Cow              | Mi2 |
|          | Cow              | Mi3 |
|          | Cow              | Mi4 |
|          | Cow              | Mi5 |
|          | Cow              | Mi6 |

**Table S2.** Instrumental mass spectrometry settings for target compounds

| Compound | Precursor ion<br>(m/z) | Product ion 1<br>(m/z) | Collision energy<br>(eV) | Product ion 2<br>(m/z) | Collision energy<br>(eV) | Retention time<br>(minute) | Internal standard |
|----------|------------------------|------------------------|--------------------------|------------------------|--------------------------|----------------------------|-------------------|
| PFBA     | 213.0                  | 169.1                  | -14                      |                        |                          | 5.1                        | MPFBA             |
| PFPeA    | 217.0                  | 172                    | -14                      |                        |                          | 8.8                        | M5PFPeA           |
| PFHxA    | 313.0                  | 269.0                  | -13                      | 119.1                  | -30                      | 10.0                       | M5PFHxA           |
| PFHpA    | 363.0                  | 319.4                  | -15                      | 169.2                  | -20                      | 10.8                       | M4PFHpA           |
| PFOA     | 413.3                  | 369.0                  | -15                      | 169.0                  | -20                      | 11.3                       | M8PFOA            |
| PFNA     | 463.0                  | 418.9                  | -13                      | 168.9                  | -26                      | 11.8                       | M9PFNA            |
| PFDA     | 513.3                  | 469.2                  | -15                      | 218.9                  | -22                      | 12.2                       | M6PFDA            |
| PFUnA    | 563.0                  | 519.0                  | -16                      | 319.0                  | -28                      | 12.5                       | M7PFUnA           |
| PFDoA    | 613.0                  | 569.0                  | -20                      | 318.9                  | -28                      | 12.8                       | M2PFDoA           |
| PFBS     | 299.0                  | 80                     | -70                      | 98.8                   | -40                      | 9.5                        | M3PFBS            |
| PFHxS    | 399.1                  | 79.9                   | -85                      | 98.9                   | -80                      | 11.0                       | M3PFHxS           |
| PFOS     | 499.0                  | 80.0                   | -106                     | 99.0                   | -80                      | 11.9                       | M8PFOS            |
| GenX     | 328.5                  | 284.9                  | -8                       | 168.9                  | -17                      | 10.3                       | M5PFHxA           |
| C6O4     | 338.9                  | 179.0                  | -6                       | 112.9                  | -13                      | 10.6                       | M5PFHxA           |
| MPFBA    | 217.0                  | 172.0                  | -14                      |                        |                          | 5.1                        |                   |
| M5PFPeA  | 268.0                  | 223.0                  | -12                      |                        |                          | 8.8                        |                   |
| M5PFHxA  | 318.0                  | 273.0                  | -13                      |                        |                          | 10.0                       |                   |
| M4PFHpA  | 367.0                  | 322.0                  | -15                      |                        |                          | 10.8                       |                   |
| M8PFOA   | 421.0                  | 376.0                  | -14                      |                        |                          | 11.3                       |                   |
| M9PFNA   | 472.0                  | 427.0                  | -15                      |                        |                          | 11.8                       |                   |
| M6PFDA   | 519.0                  | 474.0                  | -15                      |                        |                          | 12.2                       |                   |

|                      |       |       |     |      |
|----------------------|-------|-------|-----|------|
| M7PFUdA              | 570.0 | 525.0 | -16 | 12.5 |
| M2PFD <sub>o</sub> A | 614.9 | 569.9 | -16 | 12.8 |
| M3PFBS               | 302.0 | 322.0 | -15 | 9.5  |
| M3PFHxS              | 402.0 | 99.0  | -70 | 11.0 |
| M8PFOS               | 507.0 | 99.0  | -80 | 11.9 |

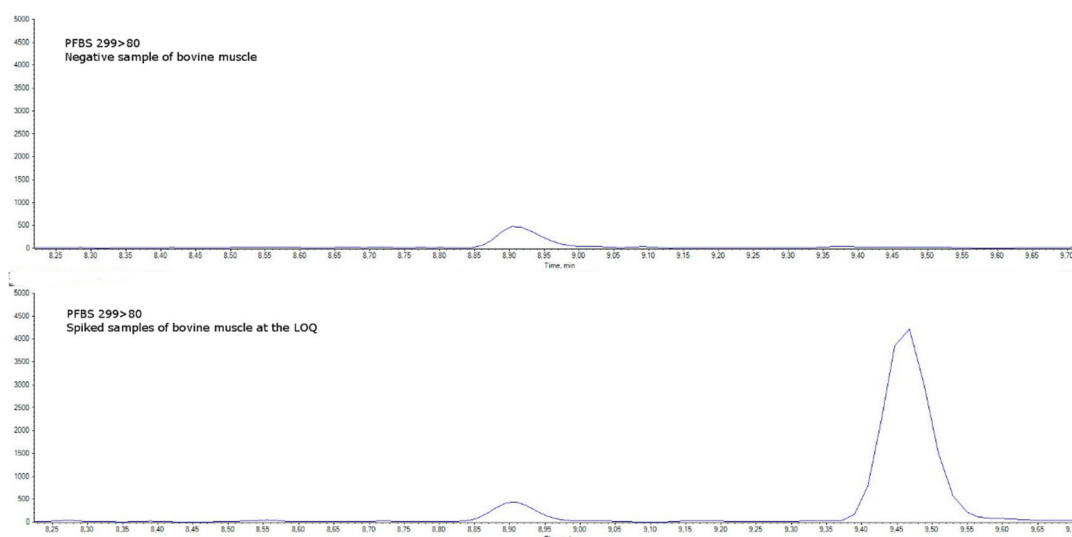

**Figure S1.** (PFBS quantitative transition 299>80). Comparison between a negative sample of bovine muscle (upper chromatogram) and spiked sample of bovine muscle at the Limit of Quantification (lower chromatogram).

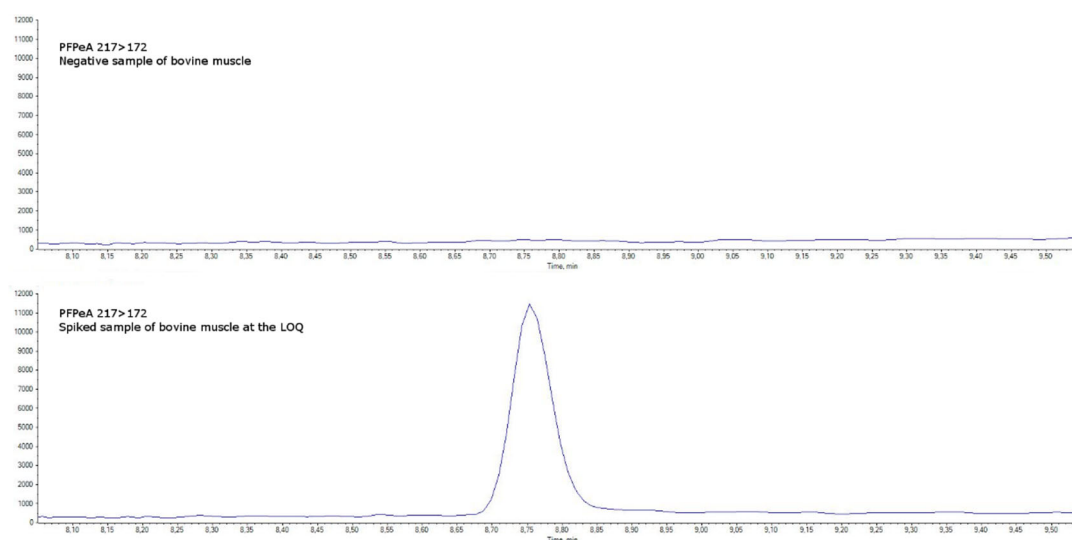

**Figure S2.** (PFPeA quantitative transition 217>172) Comparison between a negative sample of bovine muscle (upper chromatogram) and spiked sample of bovine muscle at the Limit of Quantification (lower chromatogram).

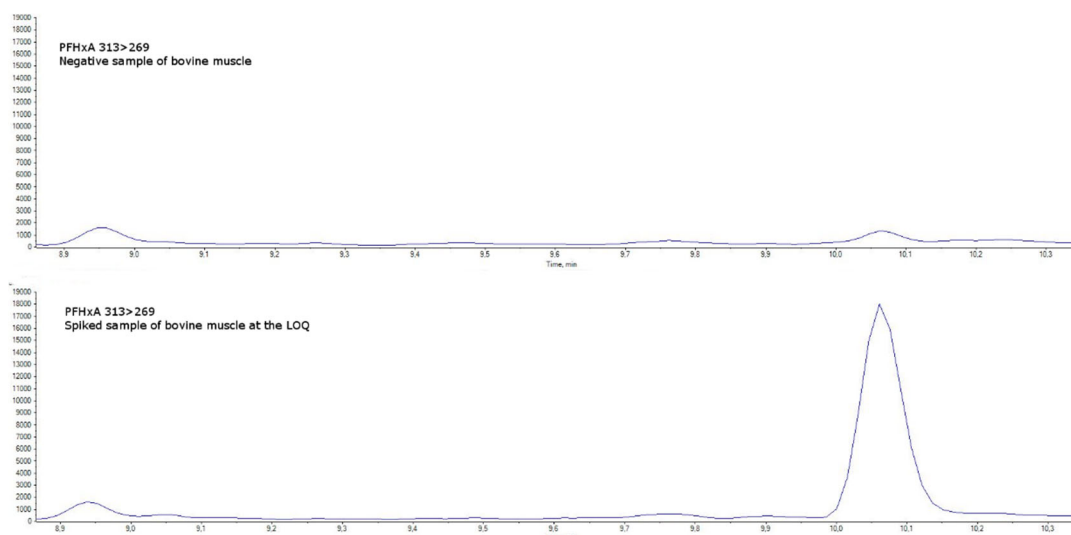

**Figure S3.** (PFHxA quantitative transition 313>269) Comparison between a negative sample of bovine muscle (upper chromatogram) and spiked sample of bovine muscle at the Limit of Quantification (lower chromatogram).

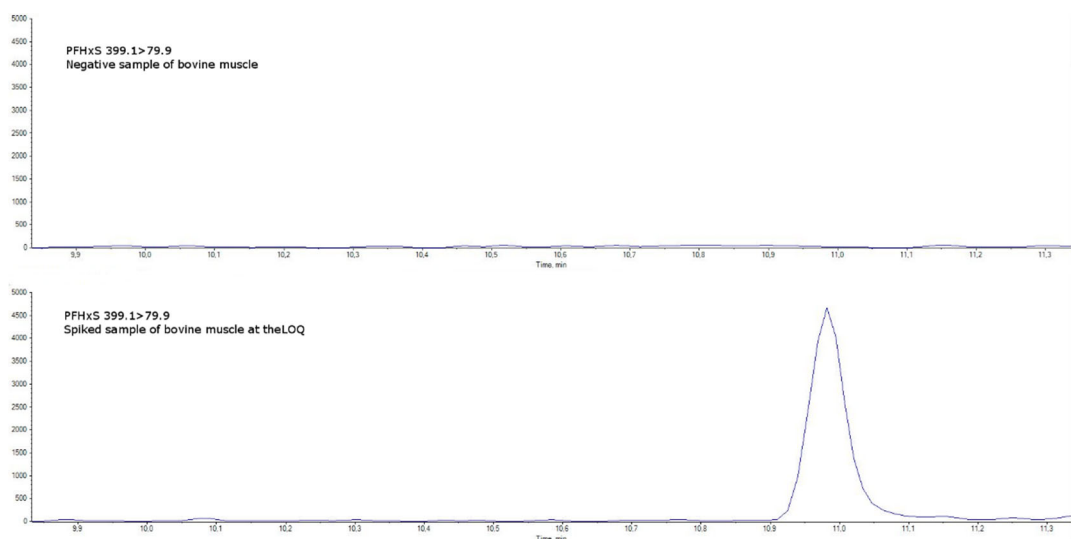

**Figure S4.** (PFHxS quantitative transition 399.1>79.9) Comparison between a negative sample of bovine muscle (upper chromatogram) and spiked sample of bovine muscle at the Limit of Quantification (lower chromatogram).

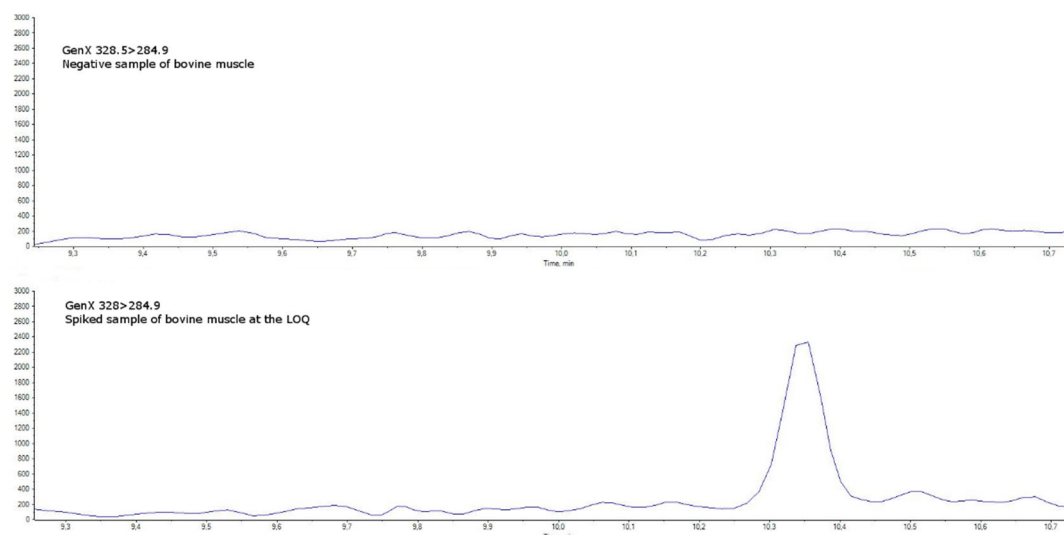

**Figure S5.** (GenX quantitative transition 328>284.9) Comparison between a negative sample of bovine muscle (upper chromatogram) and spiked sample of bovine muscle at the Limit of Quantification (lower chromatogram).

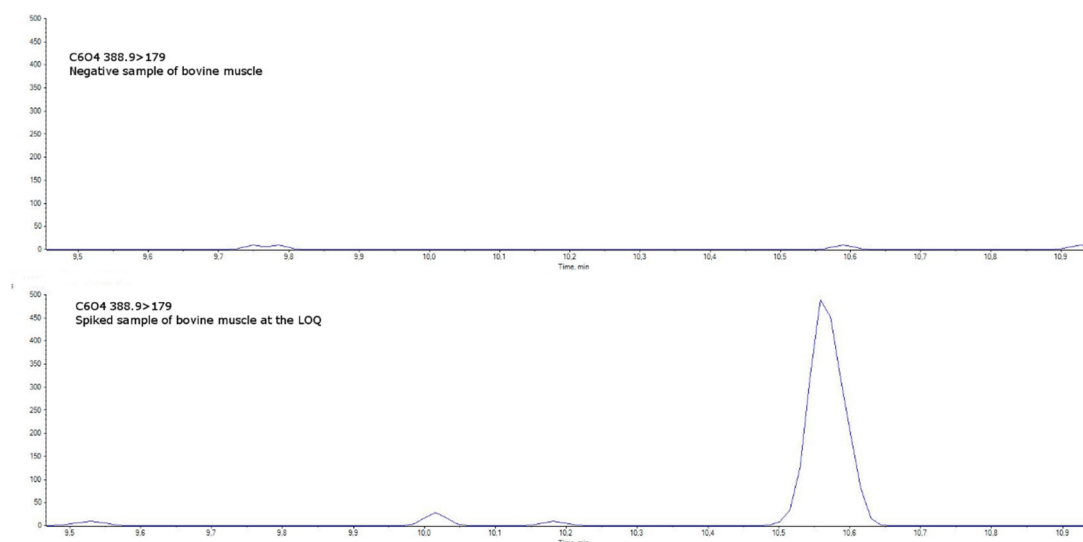

**Figure S6.** (C6O4 quantitative transition 388.9>179) Comparison between a negative sample of bovine muscle (upper chromatogram) and spiked sample of bovine muscle at the Limit of Quantification (lower chromatogram).

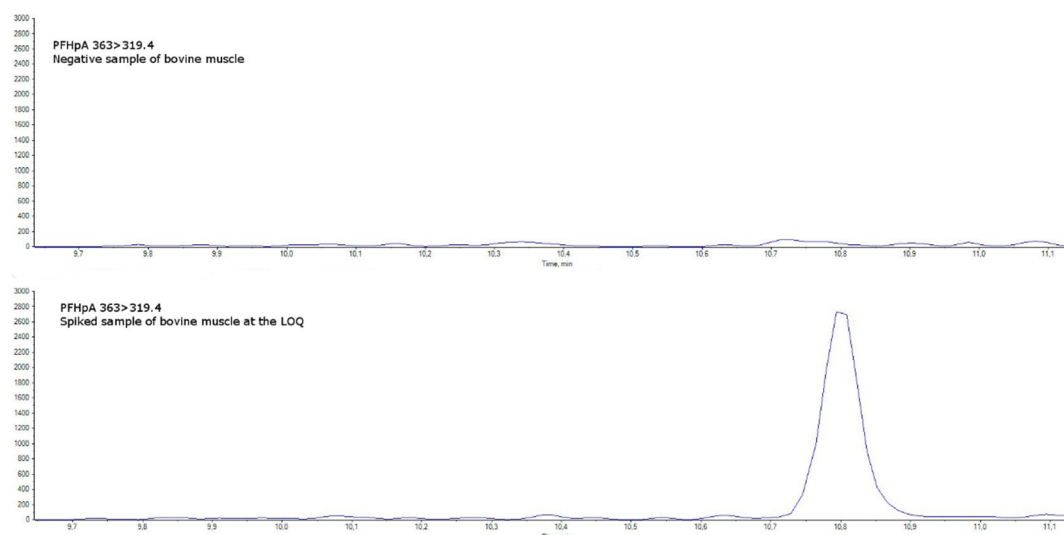

**Figure S7.** (PFHpA quantitative 363>319.4) Comparison between a negative sample of bovine muscle (upper chromatogram) and spiked sample of bovine muscle at the Limit of Quantification (lower chromatogram).

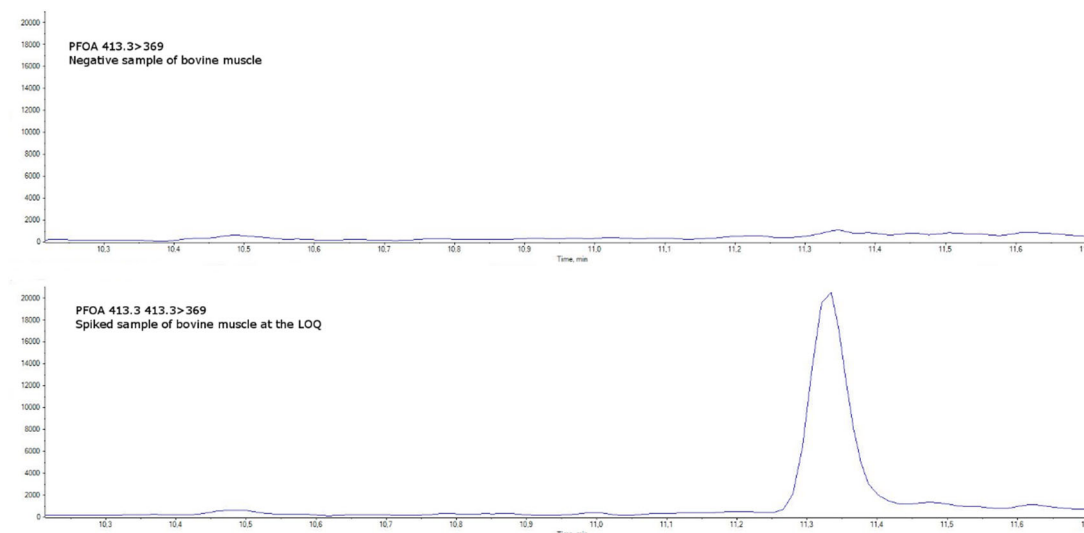

**Figure S8.** (PFOA quantitative 413.3>369) Comparison between a negative sample of bovine muscle (upper chromatogram) and spiked sample of bovine muscle at the Limit of Quantification (lower chromatogram).

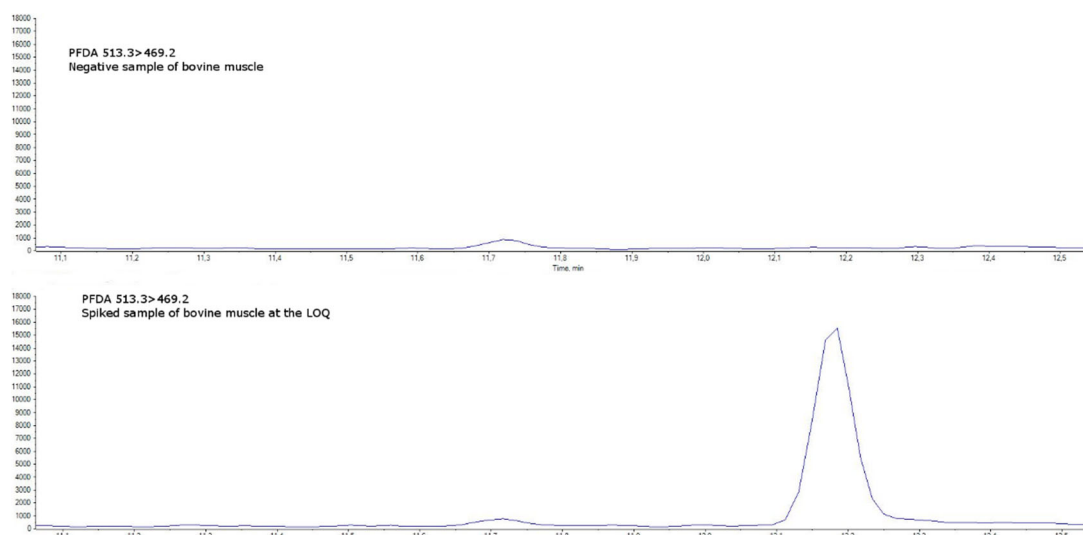

**Figure S9.** (PFDA quantitative 513.3>469.2) Comparison between a negative sample of bovine muscle (upper chromatogram) and spiked sample of bovine muscle at the Limit of Quantification (lower chromatogram).

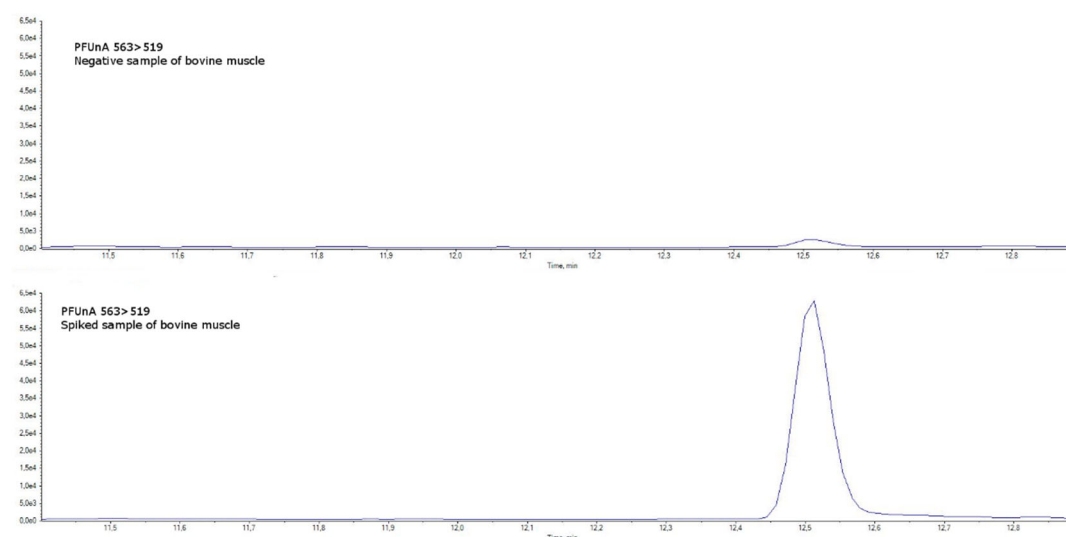

**Figure S10.** (PFUnA quantitative transition 563>519) Comparison between a negative sample of bovine muscle (upper chromatogram) and spiked sample of bovine muscle at the Limit of Quantification (lower chromatogram).

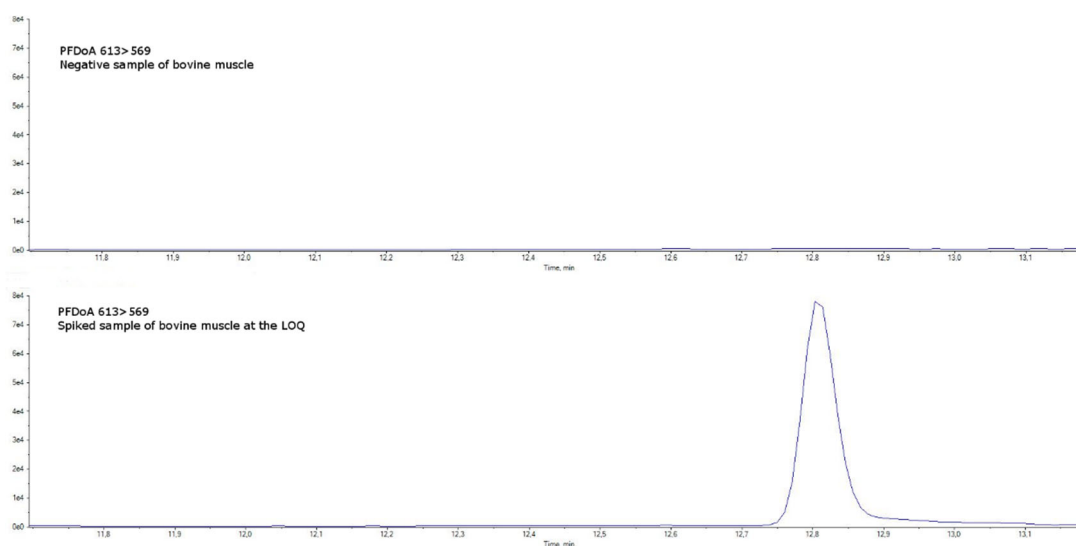

**Figure S11.** (PFDa quantitative transition 613>569) Comparison between a negative sample of bovine muscle (upper chromatogram) and spiked sample of bovine muscle at the Limit of Quantification (lower chromatogram).
